# Supplementary material for: Core–shell niobium(v) oxide@molecularly imprinted polythiophene nanoreceptors for transformative, real-time creatinine analysis
Source: Royal Society of Chemistry journal article supplement (doi:10.1039/d4na00300d), 2024-01-01
Supplement: d4na00300d1.pdf [file d4na00300d1.pdf]

## ELECTRONIC SUPPLEMENTARY INFORMATION

# Core-shell niobium(V) oxide@molecularly imprinted polythiophene nanoreceptors for transformative, real-time creatinine analysis

Zohaib Saddique<sup>1</sup>, Maleeha Saeed<sup>1</sup>, Muhammad Faheem<sup>2</sup>, Sadia Z. Bajwa<sup>3</sup>, Adnan Mujahid<sup>1</sup>,  
Adeel Afzal<sup>1\*</sup>

<sup>1</sup> Sensors and Diagnostics Lab, School of Chemistry, University of the Punjab, Quaid-i-Azam  
Campus, Lahore, 54590, Pakistan

<sup>2</sup> School of Chemistry and Chemical Engineering, Jiangsu University, Zhenjiang, Jiangsu,  
212013, P. R. China

<sup>3</sup> National Institute for Biotechnology and Genetic Engineering, PO Box 577, Jhang Road,  
Faisalabad, 38000, Pakistan

\* Corresponding author. Email: [adeel.chem@pu.edu.pk](mailto:adeel.chem@pu.edu.pk)

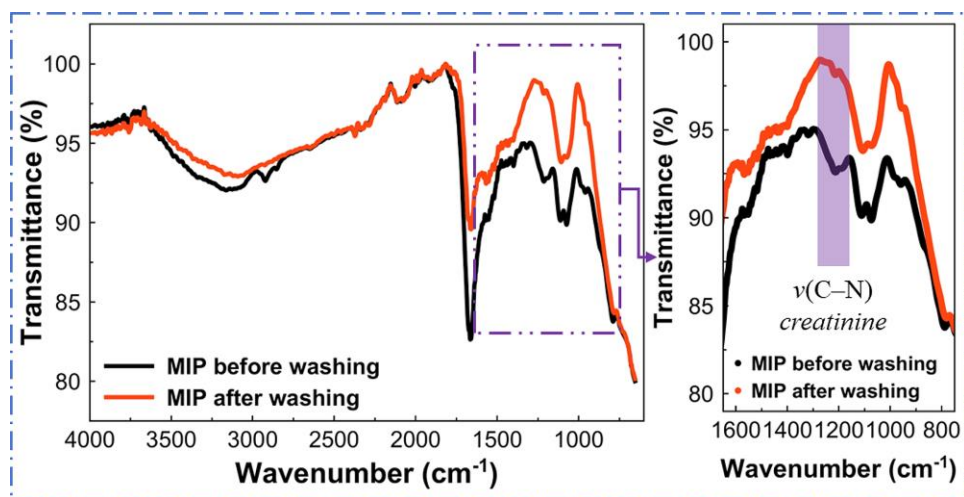

**Figure S1.** FTIR spectra of Nb<sub>2</sub>O<sub>5</sub>@MIP nanoreceptors before and after washing out the template, creatinine.

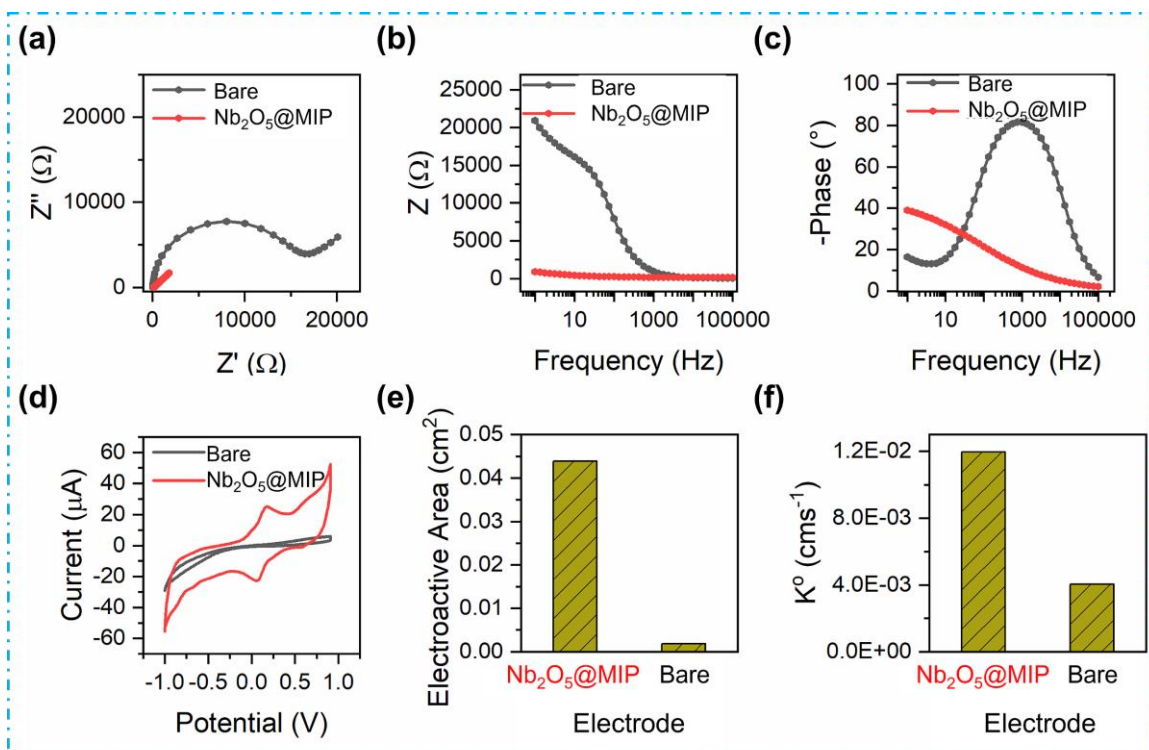

**Figure S2.** EIS and CV analyses: (a) Nyquist plots, (b) Bode magnitude plots, (c) Bode phase angle plot, and (d) CV scans of the bare and Nb<sub>2</sub>O<sub>5</sub>@MIP modified electrodes. A comparison of (e) the electroactive surface area and (f) the heterogeneous rate constant of the bare and Nb<sub>2</sub>O<sub>5</sub>@MIP modified electrodes. All measurements are performed in a redox solution containing [Fe(CN)<sub>6</sub>]<sup>3-/4-</sup> (2.5 mM), KCl (0.05 M) in PBS (pH 7.4).

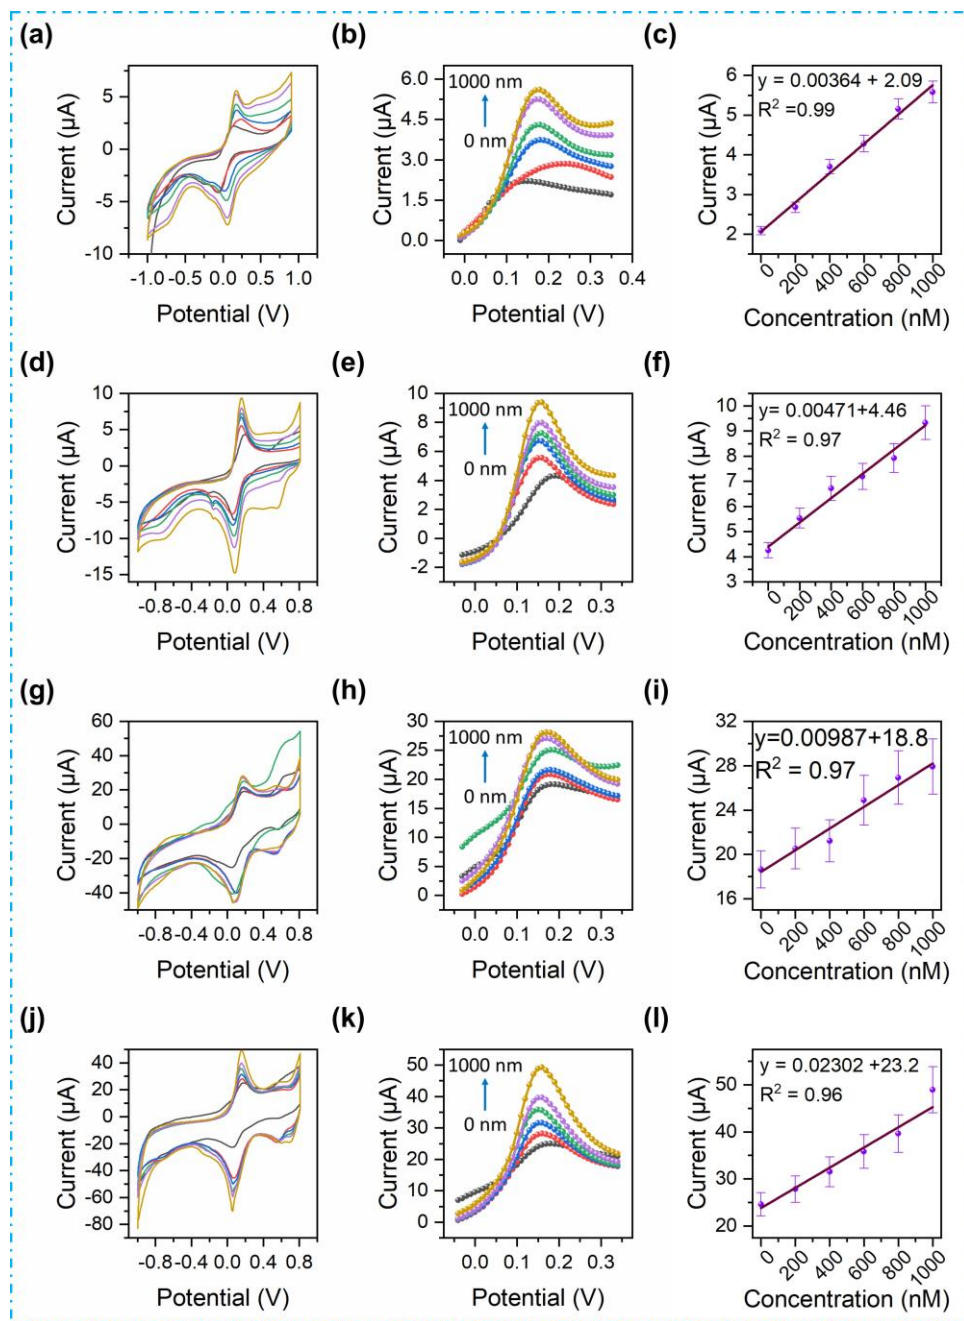

**Figure S3.** CV scans and corresponding calibration plots of (a-c) NIP, (d-f) MIP, (g-i)  $\text{Nb}_2\text{O}_5@\text{NIP}$ , and (j-l)  $\text{Nb}_2\text{O}_5@\text{MIP}$  sensors at varying concentrations of creatinine (0–1000 nM) in a redox solution. All measurements are performed in a redox solution containing  $[\text{Fe}(\text{CN})_6]^{3-/4-}$  (2.5 mM), KCl (0.05 M) in PBS (pH 7.4).
